# Supplementary material for: Genetic Dissection of Spike Productivity Traits in the Siberian Collection of Spring Barley
Source: MDPI journal article supplement (doi:10.3390/biom13060909), 2023-05-30
Supplement: s1 [file s1]

Table S1. Siberian collection varieties.

| Variety name    | Row/Type  | Katalog № ICG/VIR | Country, region RF         |
|-----------------|-----------|-------------------|----------------------------|
| Abyssinian      | nudum     | ICG-8462/K-27672  | Ethiopia                   |
| AC 0760258      | nutans    | ICG-8518          | NA                         |
| Acha            | nutans    | ICG-8028/K-30243  | Russia, Novosibirsk region |
| Agul            | ricotense | ICG-8161/K-24707  | Russia, Krasnoyarsk region |
| Alag-Erdene     | nudum     | ICG-8504/K-29415  | Yemen Arab Republic        |
| Aley            | nutans    | ICG-8516          | Russia, Altai region       |
| Altan-Bulag     | nutans    | ICG-8218/K-29268  | Russia, Buryatia           |
| Alyn-Buya       | nutans    | ICG-8434/-        | Kazakhstan                 |
| Anna            | nutans    | ICG-8413/K-30829  | Russia, Orenburg region    |
| Archekas        | nudum     | ICG-8464/-        | Russia, Kemerovo regiono   |
| Arna            | nutans    | ICG-8517          | Kazakhstan                 |
| Avalon          | nutans    | ICG-8515          | France                     |
| B-1             | pallidum  | ICG-8436          | Russia, Novosibirsk region |
| Bagan           | nutans    | ICG-8425/K-29040  | Russia, Novosibirsk region |
| Barkhatny       | ricotense | ICG-8316/K-30891  | Russia, Tyumen region      |
| Belogorsky      | pallidum  | ICG-8177/K-22089  | Russia, Leningrad region   |
| Bezenchuksky 2  | pallidum  | ICG-8267/K-30799  | Russia, Samara region      |
| Biom            | nutans    | ICG-8519 K-30984  | Russia, Novosibirsk region |
| Brodyole        | coeleste  | ICG-8071/K-24634  | USA                        |
| Chelaybinsky 70 | nutans    | ICG-8158/K-29470  | Russia, Chelyabinsk region |
| Dobry           | pallidum  | ICG-8283/K-29215  | Russia, Kirov region       |
| Donetsky 8      | medicum   | ICG-8053/K-23682  | Ukraine                    |
| Emelya          | ricotense | ICG-8527          | Russia, Krasnoyarsk region |
| G-19951         | nutans    | ICG-8522          | Russia, Novosibirsk region |
| G-19980         | nutans    | ICG-8523          | Russia, Novosibirsk region |
| G-21038         | nutans    | ICG-8524          | Russia, Novosibirsk region |
| G-21219         | nutans    | ICG-8525          | Russia, Novosibirsk region |
| G-21671         | nutans    | ICG-8526          | Russia, Novosibirsk region |
| Golozyorny 1    | nudum     | ICG-8268/K-21694  | Russia, Sverdlovsk region  |
| Granal          | nutans    | ICG-8152/K-23342  | Kazakhstan                 |
| Ilmen           | nutans    | ICG-8027/K-26968  | Russia, Sverdlovsk region  |
| Impuls          | nutans    | ICG-8260/K-29435  | Russia, Sverdlovsk region  |
| Jngve           | nutans    | ICG-8514/K-30023  | Sweden                     |
| Kedr            | pallidum  | ICG-8271/K-28119  | Russia, Krasnoyarsk region |
| Kolchan         | ricotense | ICG-8435/K-31039  | Russia, Altai region       |
| Krasnoyarsky 1  | nutans    | ICG-8259/K-19829  | Russia, Krasnoyarsk region |
| Krasnoyarsky 91 | pallidum  | ICG-8528          | Russia, Krasnoyarsk region |
| Krymchak 55     | pallidum  | ICG-8127/K-25286  | Ukraine                    |
| Kuryer          | nutans    | ICG-8246/K-26740  | Russia, Krasnodar region   |
| L-1             | nudum     | ICG-8456          | Russia, Novosibirsk region |
| L-1285          | nudum     | ICG-8451          | Russia, Novosibirsk region |
| L-259/528       | ricotense | ICG-8044/-        | Russia, Novosibirsk region |
| L-421           | nutans    | ICG-8243/K-27058  | Russia, Novosibirsk region |
| Manych 459      | nutans    | ICG-8266/K-29345  | Russia, Rostov region      |
| Mayak           | nutans    | ICG-8159/K-29622  | Russia, Krasnoyarsk region |
| Medikum         | medicum   | ICG-8322/K-29002  | Kazakhstan                 |
| Melius          | nutans    | ICG-8529          | Switzerland                |
| Merit 57        | nutans    | ICG-8530          | USA                        |

|                      |               |                  |                             |
|----------------------|---------------|------------------|-----------------------------|
| Mestny Dagestanian   | nigrum nudum  | ICG-8459/K-15010 | Russia, Primorsky Krai      |
| Mestny Ethiopian     | nigrum nudum  | ICG-8461/K-20042 | Russia, Dagestan            |
| Mestny Primorsky     | pallidum      | ICG-8211/K-15117 | Russia, Primorsky Krai      |
| Mestny Yakutian      | nigrum nudum  | ICG-8203/K-7979  | Russia, Yakutia             |
| Moskovsky 121        | nutans        | ICG-8236/K-19417 | Russia, Moscow region       |
| Mutant 68            | nudum         | ICG-8055/K-28163 | Russia, Novosibirsk region  |
| Narymchanin          | ricotense     | ICG-8287/K-27039 | Russia, Tomsk region        |
| NGB 122412           | nutans        | ICG-8531         | Russia, Novosibirsk region  |
| Nikita               | nutans        | ICG-8075/K-30900 | Russia, Kemerovo region     |
| Nosovsky 11          | nutans        | ICG-8255/K-29465 | Ukraine                     |
| Novosibirsky 80      | nutans        | ICG-8437/K-26848 | Russia, Novosibirsk region  |
| Nutans 970           | nutans        | ICG-8040/K-21794 | Kazakhstan                  |
| Obskoy               | nutans        | ICG-8031/K-24709 | Russia, Novosibirsk region  |
| Omsky 13709          | nutans        | ICG-8242/K-17843 | Russia, Omsk region         |
| Omsky 85             | pallidum      | ICG-8042/K-27927 | Russia, Omsk region         |
| Omsky golozyorny 1   | nudum         | ICG-8457/K-30919 | Russia, Omsk region         |
| Omsky golozyorny 2   | coeleste      | ICG-8458/-       | Russia, Omsk region         |
| Orenburgsky kormovoy | nutans        | ICG-8248/K-29496 | Russia, Orenburg region     |
| Oskar                | nutans        | ICG-8463/K-31040 | Russia, Krasnoyarsk region  |
| Pallidum 394         | pallidum      | ICG-8174/K-20916 | Russia, Buryatia            |
| Prikumsky 14         | nutans        | ICG-8286/K-25075 | Russia, Stavropol Territory |
| Reyd                 | nutans        | ICG-8014/K-28885 | Russia, Sverdlovsk region   |
| Sasha                | medicum       | ICG-8532/K-31110 | Russia, Omsk region         |
| Selection from Tyal  | coeleste      | ICG-8226/-       | Russia, Novosibirsk region  |
| Severny              | pallidum      | ICG-8066/K-25298 | Russia, Leningrad region    |
| Signal               | nutans        | ICG-8032/K-30846 | Russia, Altai region        |
| Simvol               | nutans        | ICG-8077/K-27502 | Russia, Rostov region       |
| Slavyansky           | nutans        | ICG-8139/K-29611 | Russia, Voronezh region     |
| Sobolyok             | ricotense     | ICG-8375/K-30245 | Russia, Krasnoyarsk region  |
| Svetik               | parallelum    | ICG-8038/K-29009 | Russia, Arkhangelsk region  |
| Symbat               | nutans        | ICG-8533         | Kazakhstan                  |
| Taganay              | nutans        | ICG-8029/K-29001 | Russia, Chelyabinsk region  |
| Talan                | nutans        | ICG-8534         | Russia, Novosibirsk region  |
| Tanay                | nutans        | ICG-8535         | Russia, Novosibirsk region  |
| Tarsky 1             | nutans        | ICG-8214/K-30150 | Russia, Omsk region         |
| Tatum                | nutans        | ICG-8536         | Germany                     |
| Temp                 | nutans        | ICG-8279/K-22055 | Russia, Krasnodar region    |
| Vikont               | nutans        | ICG-8520/K-30301 | Russia, Krasnodar region    |
| Viner                | nutans        | ICG-8136/K-8514  | Russia, Kirov region        |
| Viner mutant         | nutans        | ICG-8293/-       | Russia, Leningrad region    |
| Vorsinsky 2          | nutans        | ICG-8521         | Russia, Altai region        |
| Vybor                | ricotense     | ICG-8130/K-29409 | Russia, Moscow region       |
| Wial                 | horsfordianum | ICG-8392/-       | USA                         |
| Zalarinets           | nutans        | ICG-8209/K-16955 | Russia, Irkutsk region      |
| Zernogradsky 86      | nutans        | ICG-8065/K-25936 | Russia, Rostov region       |
| Zolotnik             | medicum       | ICG-8439/K-30845 | Russia, Altai region        |
